# Supplementary material
Source: PubMed Central journal article supplement (PMC7214863)
Supplement: mmc1.pdf [file mmc1.pdf]

# THE LANCET

## Microbe

### **Supplementary appendix**

This appendix formed part of the original submission and has been peer reviewed. We post it as supplied by the authors.

Supplement to: Chin A W H, Chu J T S, Perera M R A, et al. Stability of SARS-CoV-2 in different environmental conditions. *Lancet Microbe* 2020; published online April 2. [https://doi.org/10.1016/S2666-5247\(20\)30003-3](https://doi.org/10.1016/S2666-5247(20)30003-3).

Table. Stability of SARS-CoV-2 at different environmental conditions.

A) Temperature\*

| Time    | Virus titre (Log TCID <sub>50</sub> /mL) |      |      |      |      |      |      |      |      |      |
|---------|------------------------------------------|------|------|------|------|------|------|------|------|------|
|         | 4°C                                      |      | 22°C |      | 37°C |      | 56°C |      | 70°C |      |
|         | Mean                                     | ±SD  | Mean | ±SD  | Mean | ±SD  | Mean | ±SD  | Mean | ±SD  |
| 1 min   | N.D.                                     | N.D. | 6.51 | 0.27 | N.D. | N.D. | 6.65 | 0.1  | 5.34 | 0.17 |
| 5 mins  | N.D.                                     | N.D. | 6.7  | 0.15 | N.D. | N.D. | 4.62 | 0.44 | U    | -    |
| 10 mins | N.D.                                     | N.D. | 6.63 | 0.07 | N.D. | N.D. | 3.84 | 0.32 | U    | -    |
| 30 mins | 6.51                                     | 0.27 | 6.52 | 0.28 | 6.57 | 0.17 | U    | -    | U    | -    |
| 1 hr    | 6.57                                     | 0.32 | 6.33 | 0.21 | 6.76 | 0.05 | U    | -    | U    | -    |
| 3 hrs   | 6.66                                     | 0.16 | 6.68 | 0.46 | 6.36 | 0.19 | U    | -    | U    | -    |
| 6 hrs   | 6.67                                     | 0.04 | 6.54 | 0.32 | 5.99 | 0.26 | U    | -    | U    | -    |
| 12 hrs  | 6.58                                     | 0.21 | 6.23 | 0.05 | 5.28 | 0.23 | U    | -    | U    | -    |
| 1 day   | 6.72                                     | 0.13 | 6.26 | 0.05 | 3.23 | 0.05 | U    | -    | U    | -    |
| 2 days  | 6.42                                     | 0.37 | 5.83 | 0.28 | U    | -    | U    | -    | U    | -    |
| 4 days  | 6.32                                     | 0.27 | 4.99 | 0.18 | U    | -    | U    | -    | U    | -    |
| 7 days  | 6.65                                     | 0.05 | 3.48 | 0.24 | U    | -    | U    | -    | U    | -    |
| 14 days | 6.04                                     | 0.18 | U    | -    | U    | -    | U    | -    | U    | -    |

B) Surfaces\*

| Time    | Virus titre (Log TCID <sub>50</sub> /ml) |      |              |      |                   |      |                   |      |       |      |
|---------|------------------------------------------|------|--------------|------|-------------------|------|-------------------|------|-------|------|
|         | Paper                                    |      | Tissue paper |      | Wood              |      | Cloth             |      | Glass |      |
|         | Mean                                     | ±SD  | Mean         | ±SD  | Mean              | ±SD  | Mean              | ±SD  | Mean  | ±SD  |
| 0 min   | 4.76                                     | 0.10 | 5.48         | 0.10 | 5.66              | 0.39 | 4.84              | 0.17 | 5.83  | 0.04 |
| 30 mins | 2.18                                     | 0.05 | 2.19         | 0.17 | 3.84              | 0.39 | 2.84              | 0.24 | 5.81  | 0.27 |
| 3 hrs   | U                                        | -    | U            | -    | 3.41              | 0.26 | 2.21 <sup>#</sup> | -    | 5.14  | 0.05 |
| 6 hrs   | U                                        | -    | U            | -    | 2.47              | 0.23 | 2.25              | 0.08 | 5.06  | 0.31 |
| 1 day   | U                                        | -    | U            | -    | 2.07 <sup>#</sup> | -    | 2.07 <sup>#</sup> | -    | 3.48  | 0.37 |
| 2 days  | U                                        | -    | U            | -    | U                 | -    | U                 | -    | 2.44  | 0.19 |
| 4 days  | U                                        | -    | U            | -    | U                 | -    | U                 | -    | U     | -    |
| 7 days  | U                                        | -    | U            | -    | U                 | -    | U                 | -    | U     | -    |

  

| Time    | Banknote |      | Stainless steel |      | Plastic |      | Mask, inner layer |      | Mask, outer layer |      |
|---------|----------|------|-----------------|------|---------|------|-------------------|------|-------------------|------|
|         | Mean     | ±SD  | Mean            | ±SD  | Mean    | ±SD  | Mean              | ±SD  | Mean              | ±SD  |
| 0 min   | 6.05     | 0.34 | 5.80            | 0.02 | 5.81    | 0.03 | 5.88              | 0.69 | 5.78              | 0.10 |
| 30 mins | 5.83     | 0.29 | 5.23            | 0.05 | 5.83    | 0.04 | 5.84              | 0.18 | 5.75              | 0.08 |
| 3 hrs   | 4.77     | 0.07 | 5.09            | 0.04 | 5.33    | 0.22 | 5.24              | 0.08 | 5.11              | 0.29 |
| 6 hrs   | 4.04     | 0.29 | 5.24            | 0.08 | 4.68    | 0.10 | 5.01              | 0.50 | 4.97              | 0.51 |
| 1 day   | 3.29     | 0.60 | 4.85            | 0.20 | 3.89    | 0.33 | 4.21              | 0.08 | 4.73              | 0.05 |
| 2 days  | 2.47     | 0.23 | 4.44            | 0.20 | 2.76    | 0.10 | 3.16              | 0.07 | 4.20              | 0.07 |
| 4 days  | U        | -    | 3.26            | 0.10 | 2.27    | 0.09 | 2.47              | 0.28 | 3.71              | 0.50 |
| 7 days  | U        | -    | U               | -    | U       | -    | U                 | -    | 2.79              | 0.46 |

C) Disinfectants\*

| Disinfectant<br>(Working concentration) | Virus titre (Log TCID <sub>50</sub> /mL) |         |         |
|-----------------------------------------|------------------------------------------|---------|---------|
|                                         | 5 mins                                   | 15 mins | 30 mins |
| Household bleach (1:49)                 | U                                        | U       | U       |
| Household bleach (1:99)                 | U                                        | U       | U       |
| Hand soap solution (1:49)               | 3.6 <sup>#</sup>                         | U       | U       |
| Ethanol (70%)                           | U                                        | U       | U       |
| Povidone-iodine (7.5%)                  | U                                        | U       | U       |
| Chloroxylenol (0.05%)                   | U                                        | U       | U       |
| Chlorhexidine (0.05%)                   | U                                        | U       | U       |
| Benzalkonium chloride (0.1%)            | U                                        | U       | U       |

D) pH\*

| pH<br>(60 mins) | Virus titre<br>(Log TCID <sub>50</sub> /mL) |      |
|-----------------|---------------------------------------------|------|
|                 | Mean                                        | ±SD  |
| 3               | 5.55                                        | 0.25 |
| 4               | 5.67                                        | 0.36 |
| 5               | 5.73                                        | 0.04 |
| 6               | 5.75                                        | 0.08 |
| 7               | 5.58                                        | 0.22 |
| 8               | 5.70                                        | 0.14 |
| 9               | 5.54                                        | 0.44 |
| 10              | 5.51                                        | 0.11 |

\* All the virus titres were titrated using Vero-E6 cells. All experimental studies were done in three independent triplicates. Detection limit of a typical TCID<sub>50</sub> assay is 100 TCID<sub>50</sub>/mL, except reactions containing hand soap/chloroxylenol (detection limit: 10<sup>3</sup> TCID<sub>50</sub>/mL) or reactions containing povidone-iodine/chlorhexidin/benzalkonium chloride; detection limit: 10<sup>4</sup> TCID<sub>50</sub>/mL because of their cytotoxic effects. N.D.: not done, U: undetectable.

<sup>#</sup> Only one of the triplicate reactions was positive in the TCID<sub>50</sub> assay.

# Appendix: Biphasic decay of infectious SARS-CoV-2 population

## A) Glass

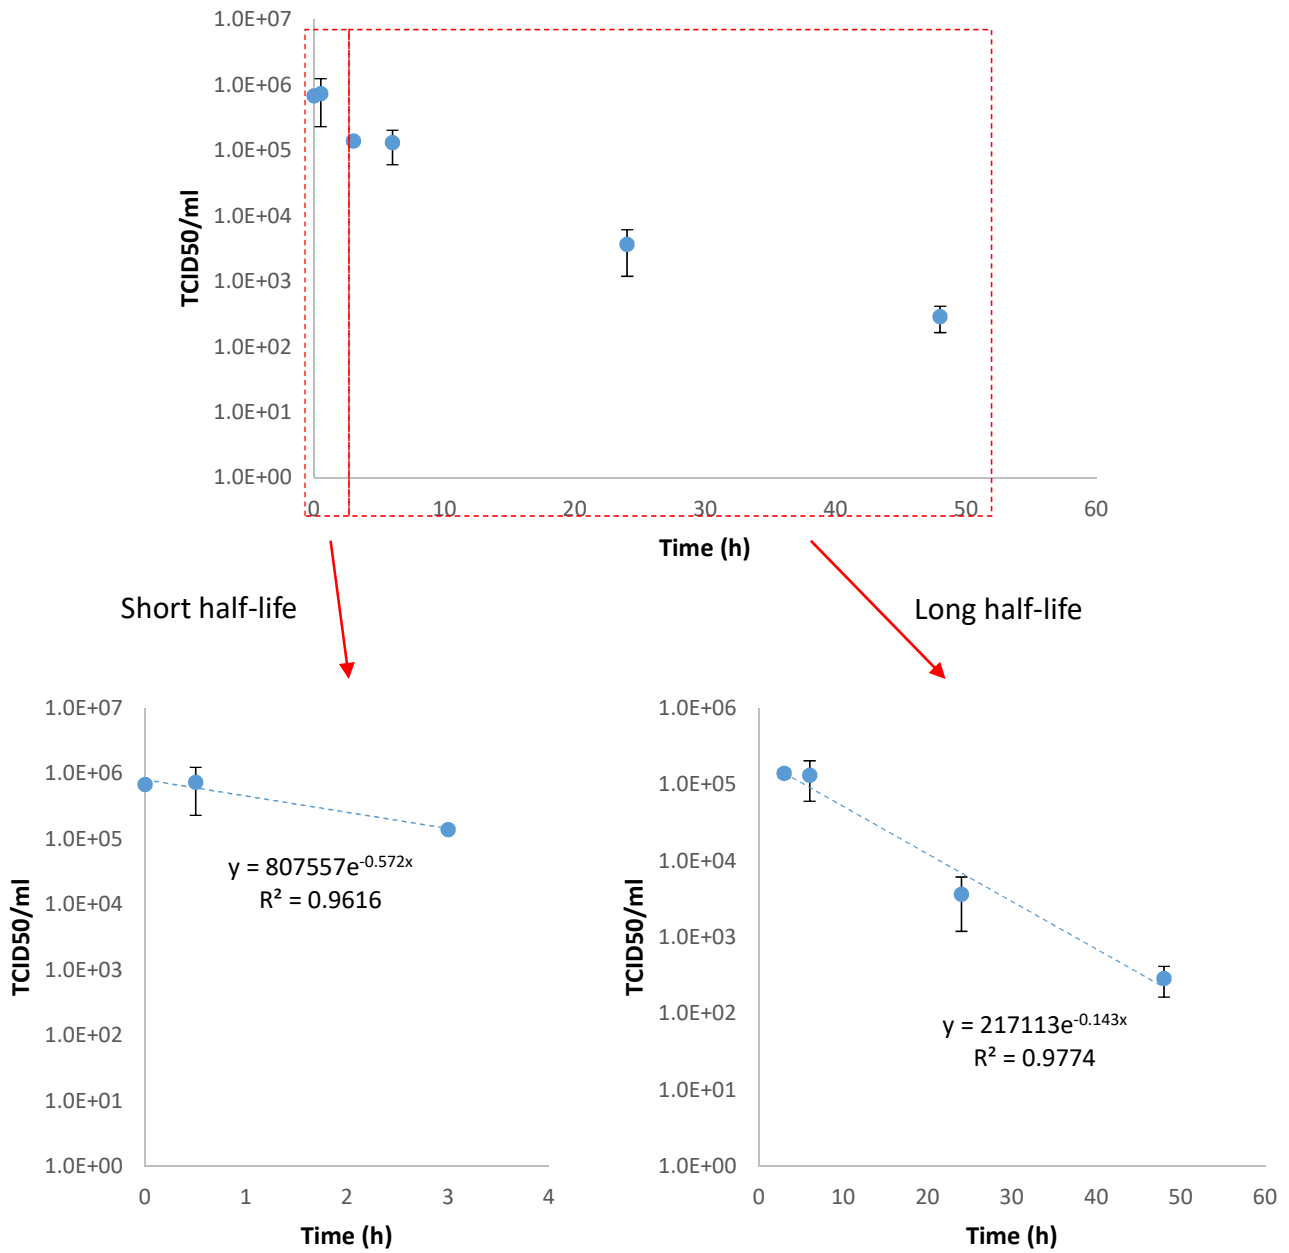

Half-life of free infectious SARS-CoV-2: 0 - 3 hr,  $T_{1/2} = 1.2$  hr  
3 hr - 2d,  $T_{1/2} = 4.8$  hr

## B) Banknote

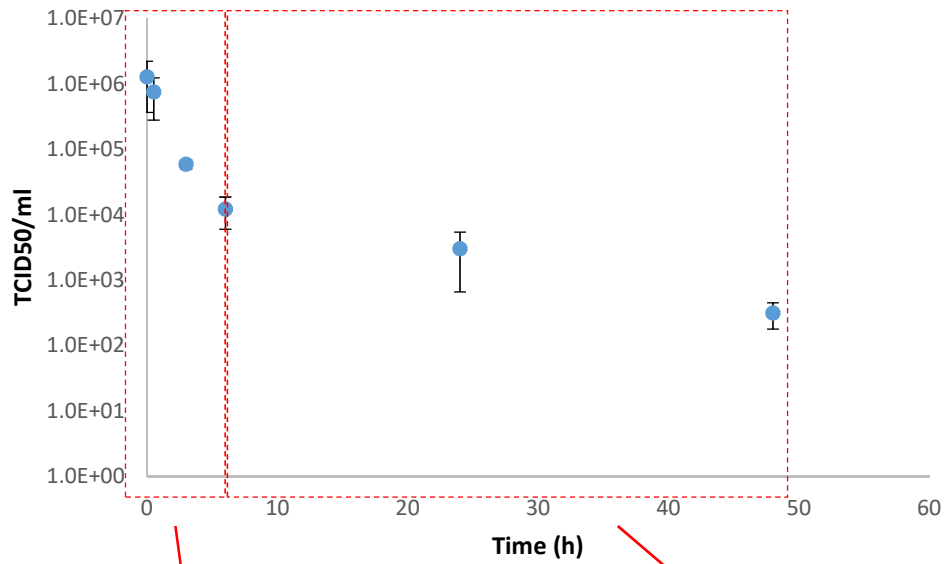

Short half-life

Long half-life

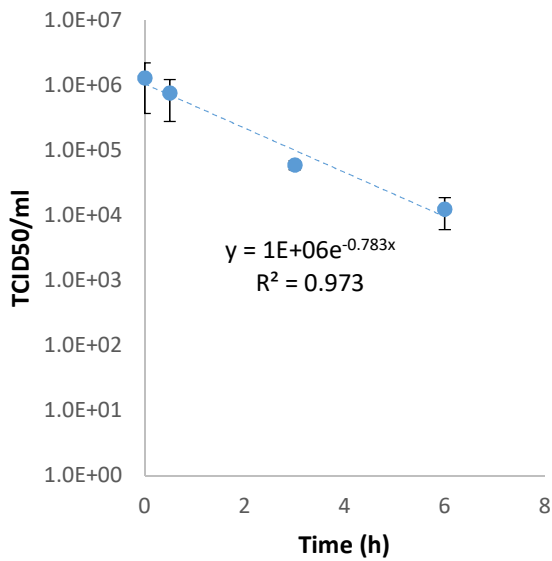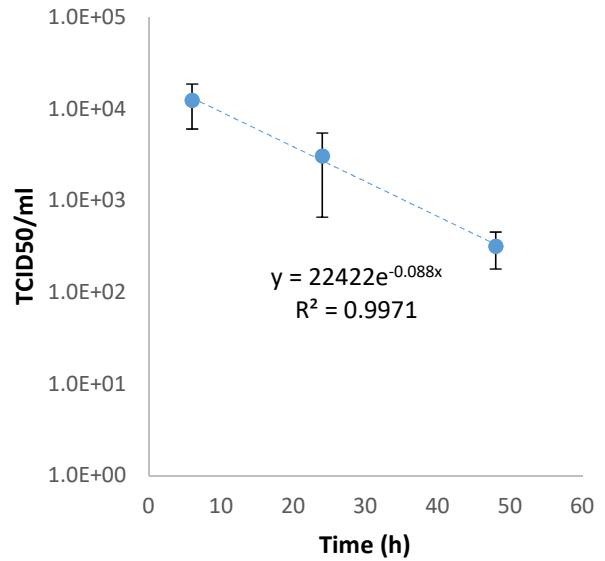

Half-life of free infectious SARS-CoV-2: 0 - 6 hr,  $T_{1/2} = 0.9$  hr  
 6 hr - 2d,  $T_{1/2} = 7.9$  hr

### C) Stainless steel

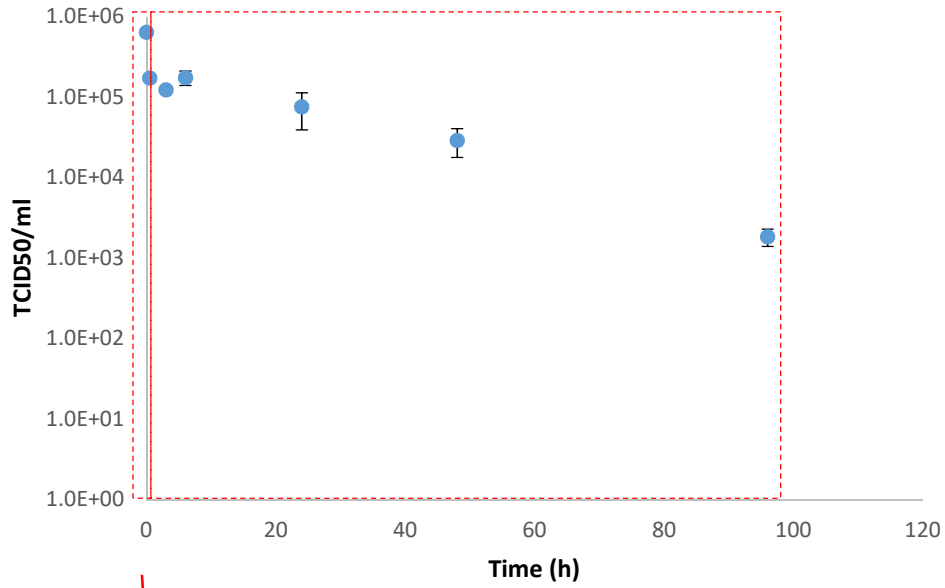

Short half-life

Long half-life

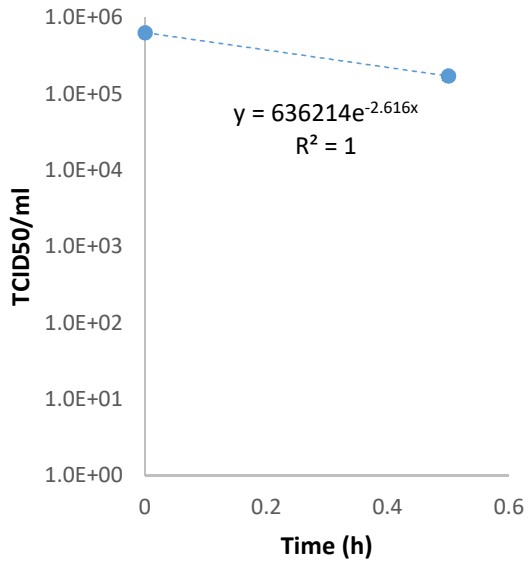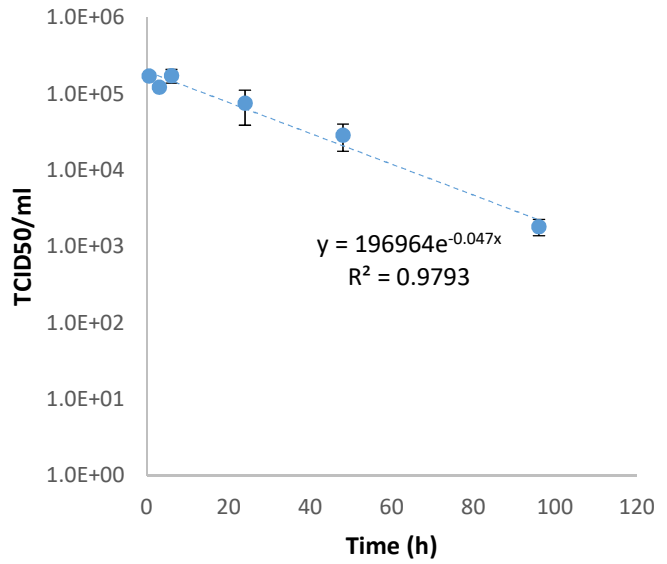

Half-life of free infectious SARS-CoV-2: 0-30 min,  $T_{1/2} = 0.3$  hr  
 30 min - 4d,  $T_{1/2} = 14.7$  hr

### D) Plastic

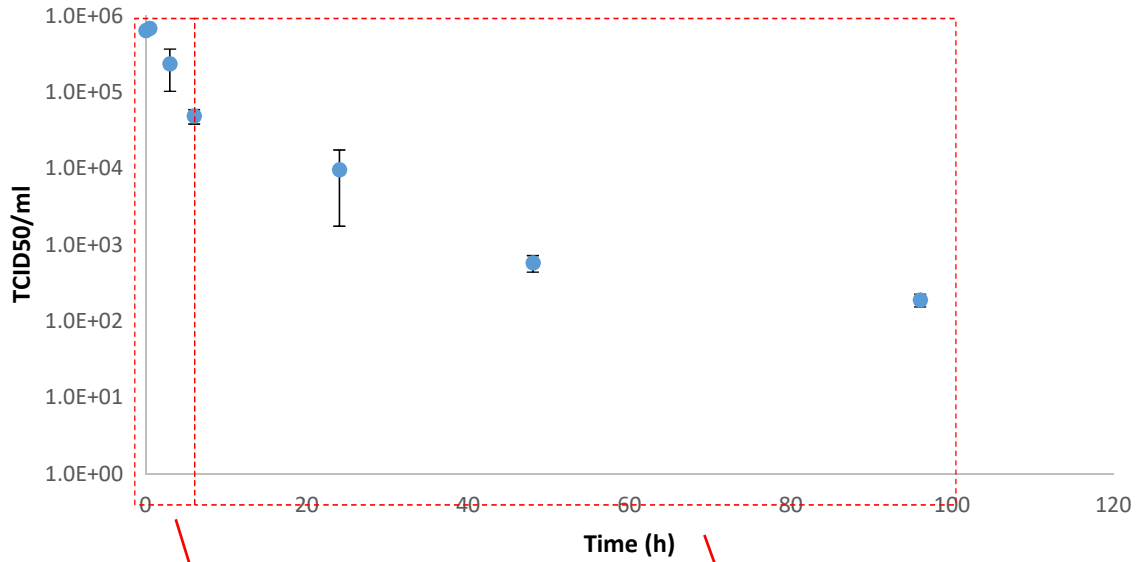

Short half-life

Long half-life

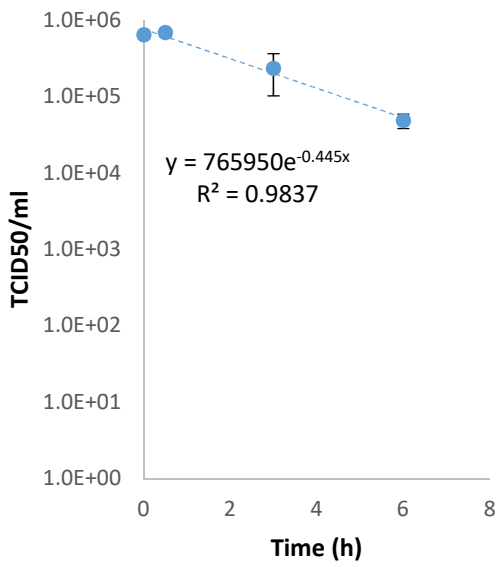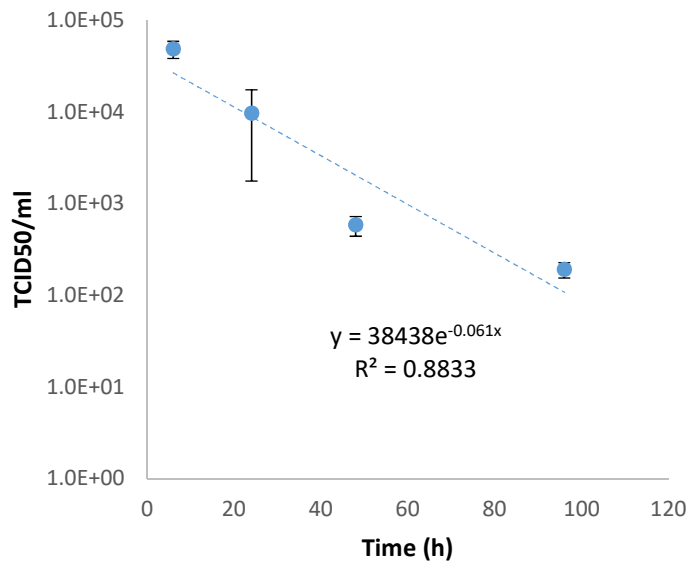

Half-life of free infectious SARS-CoV-2: 0 - 6 hr,  $T_{1/2} = 1.6$  hr  
 6 hr - 4 d,  $T_{1/2} = 11.4$  hr

### E) Mask, inner layer

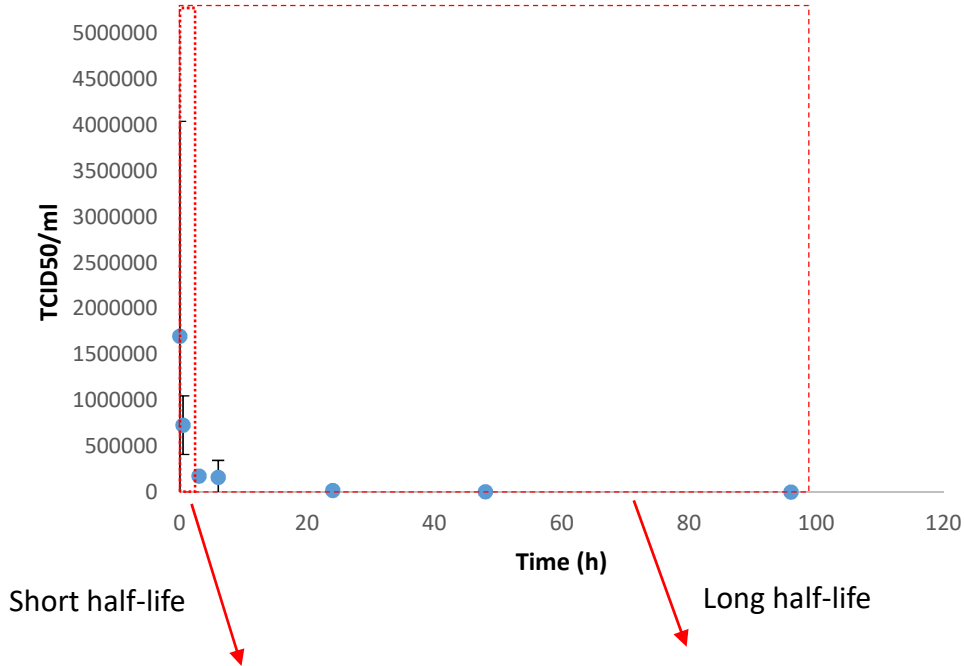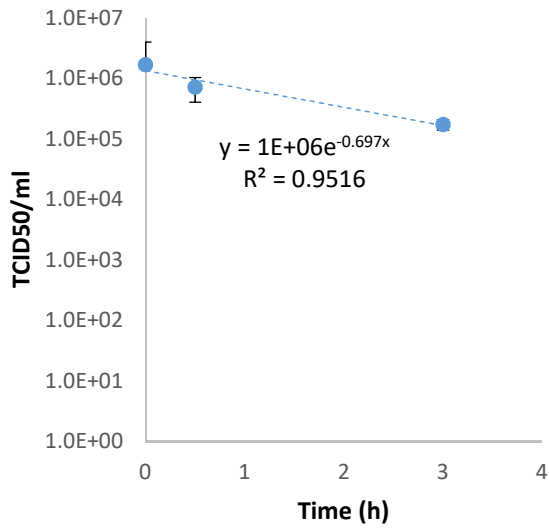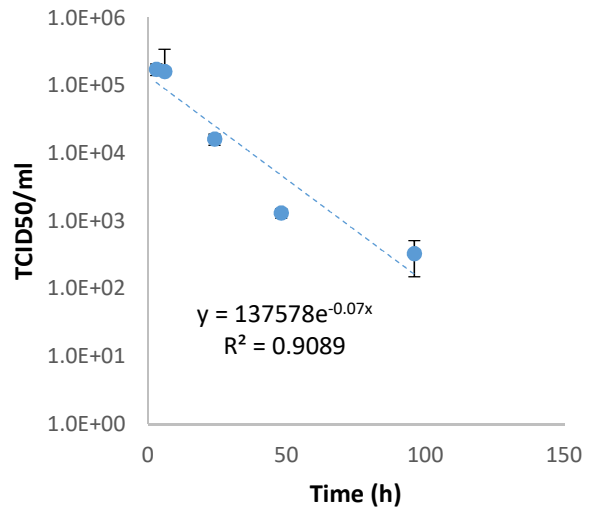

Half-life of free infectious SARS-CoV-2: 0-3hr,  $T_{1/2} = 1.0\text{hr}$   
 6hr-4d,  $T_{1/2} = 9.9\text{hr}$

### F) Mask, outer layer

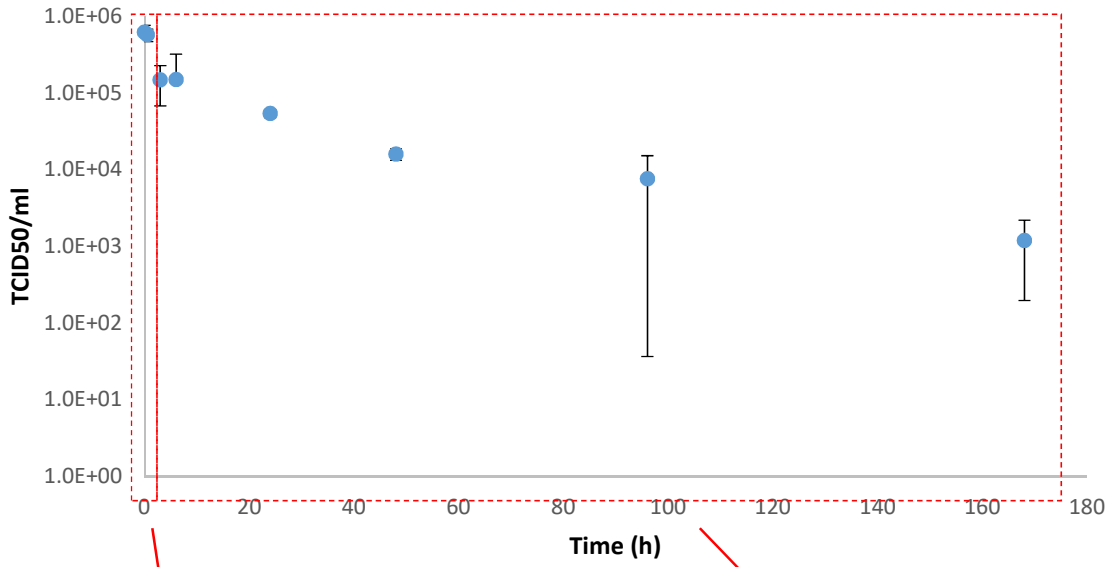

Short half-life

Long half-life

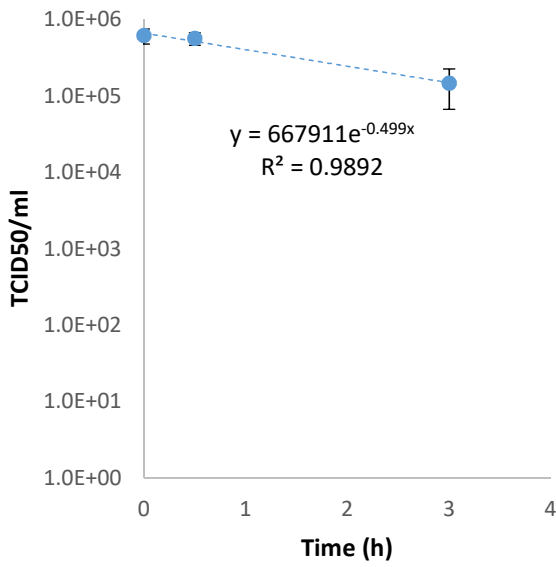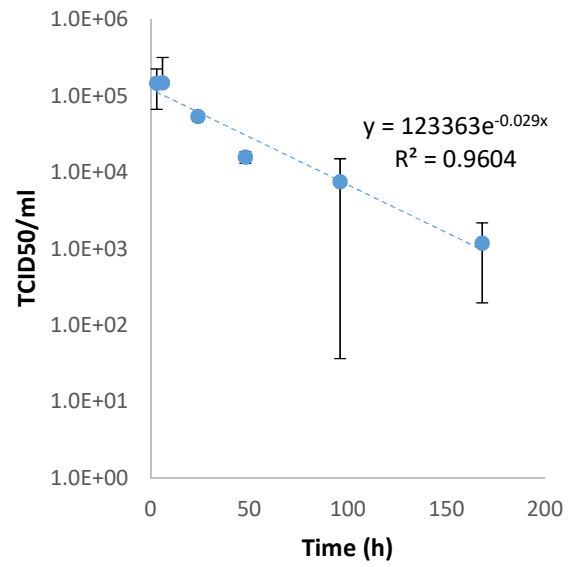

Half-life of free infectious SARS-CoV-2: 0 - 3 hr,  $T_{1/2} = 1.4$  hr  
3 hr - 7 d,  $T_{1/2} = 23.9$  hr
